# Supplementary material for: Using ambient ozone for assignment of double bond position in unsaturated lipids
Source: Royal Society of Chemistry journal article supplement (doi:10.1039/c1an15864c), 2011-11-26
Supplement: c1an15864c.pdf [file c1an15864c.pdf]

## Supporting Information For

### Using Ambient Ozone for Assignment of Double Bond Position In Unsaturated Lipids

Shane R. Ellis<sup>a</sup>, Jessica R. Hughes<sup>b</sup>, Todd W. Mitchell<sup>c</sup>, Marc in het Panhuis<sup>d</sup> and Stephen J. Blanksby<sup>a\*</sup>

<sup>a</sup>ARC Centre of Excellence for Free Radical Chemistry and Biotechnology, School of Chemistry, University of Wollongong, Wollongong, NSW 2522, Australia

<sup>b</sup>Graduate School of Medicine, University of Wollongong, Wollongong, NSW 2522, Australia

<sup>c</sup>School of Health Sciences, University of Wollongong, Wollongong, NSW 2522, Australia

<sup>d</sup>School of Chemistry, University of Wollongong, Wollongong, NSW 2522, Australia

\*Address reprint requests to:

Dr Stephen Blanksby, School of Chemistry, University of Wollongong, NSW, Australia, 2522,

Tel: +61 2 4221 5484, Fax: +61 2 4221 4287, Email: blanksby@uow.edu.au

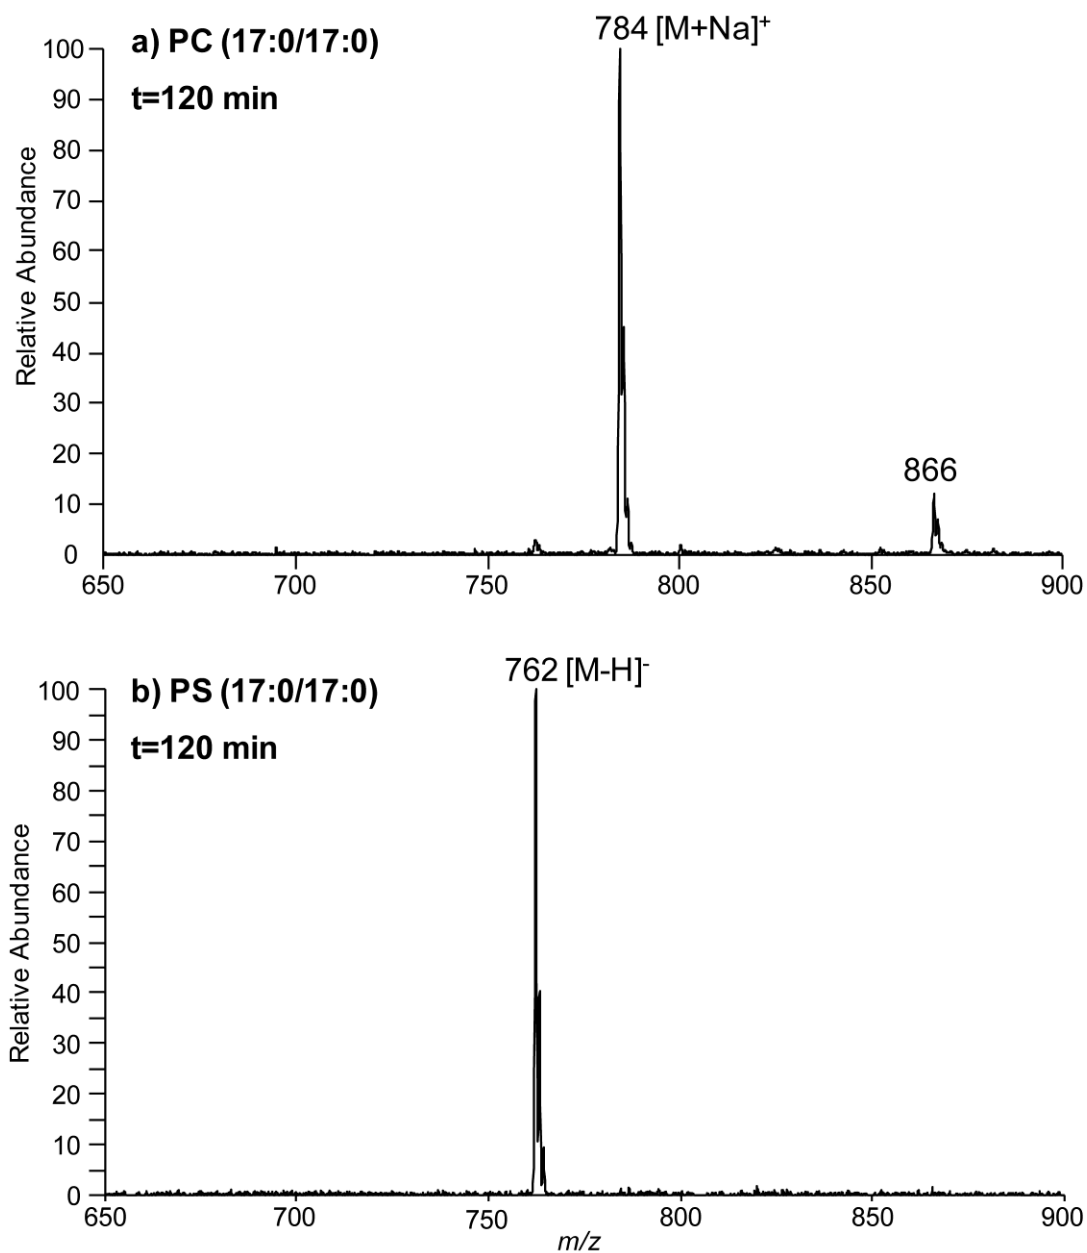

**Figure S1.** (a) Positive ion DESI-MS spectrum acquired from PC (17:0/17:0) and (b) negative ion DESI-MS spectrum acquired from PS (17:0/17:0) following deposition onto PTFE coated slide and exposure to laboratory air for 2 hours prior to analysis. As expected no ozonolysis products are observed for these saturated lipids.

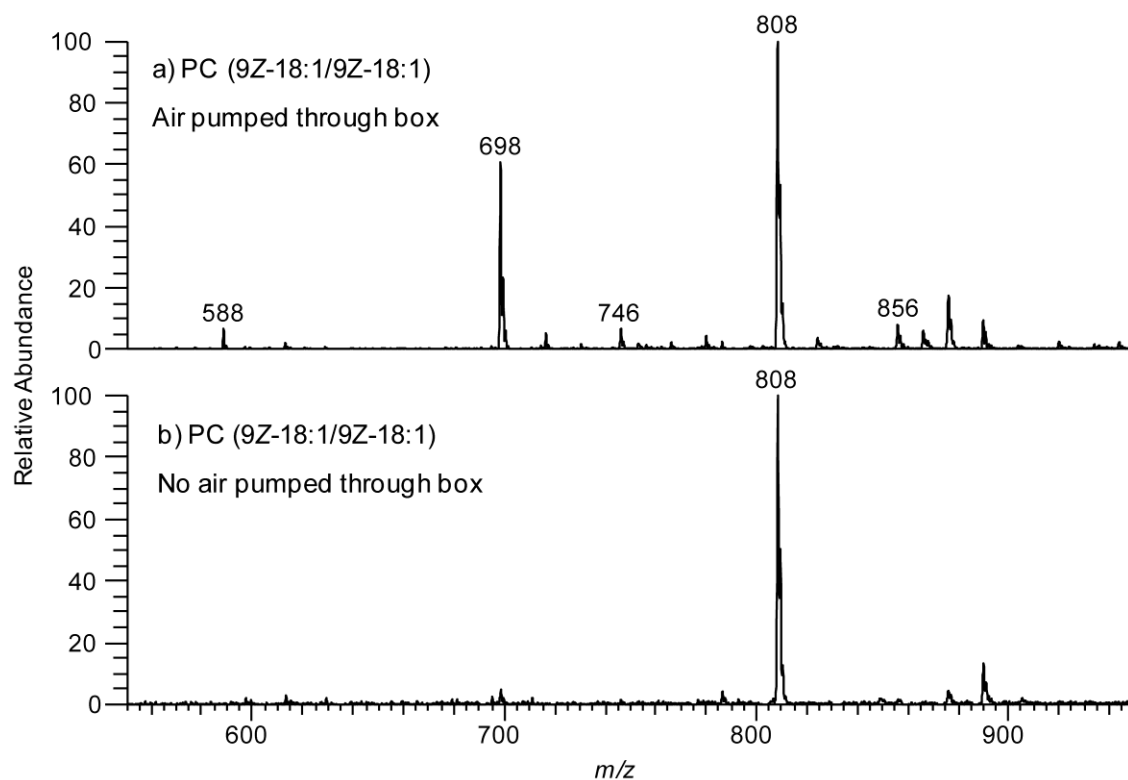

**Figure S2.** DESI-MS spectra acquired from PC (9Z-18:1/9Z-18:1) deposited onto PTFE slides and placed in an environmental chamber sealed to external air with (a) ambient air continuously pumped through the box for 1 hour and (b) no air pumped through box for 1 hour prior to analysis.

## Analysis of the CID spectrum of $[M+Na+2O_3-C_9H_{18}O_2]^+$ formed from $[PC(9Z-18:1/9Z-18:1)+Na]^+$

The CID spectrum of the  $[M+Na+2O_3-C_9H_{18}O_2]^+$  at  $m/z$  746 (Figure S3) reveals an reveals two ions at  $m/z$  588 and 614 corresponding to the aldehyde and Criegee ions formed following further oxidative cleavage of the intact 9Z-18:1 fatty acid chain, thus providing strong evidence for the assignment of this ion as an ozonide. This  $m/z$  588 ion, assigned as the di-aldehyde species, is identical to the  $m/z$  588 ion observed in the DESI-MS spectrum in Figure 1(a). The ions at  $m/z$  687, 529 and 545 correspond to the loss of  $N(CH_3)_3$  from the aldehyde and Criegee ions, respectively, while the  $m/z$  700 ion corresponds to the loss of formic acid (*cf.*  $m/z$  856). The  $m/z$  559 ion is assigned to the decomposition of the secondary ozonide via an identical mechanism to the formation of the  $m/z$  669 ion following CID of the  $[M+Na+O_3]^+$  ion. Further evidence for the assignment of  $m/z$  588 and 746 as products originating from ozonolysis of both fatty acid chains is provided by their presence in the CID spectrum of  $[M+Na+2O_3]^+$  observed at  $m/z$  904 in Figure 1(a) (data not shown).

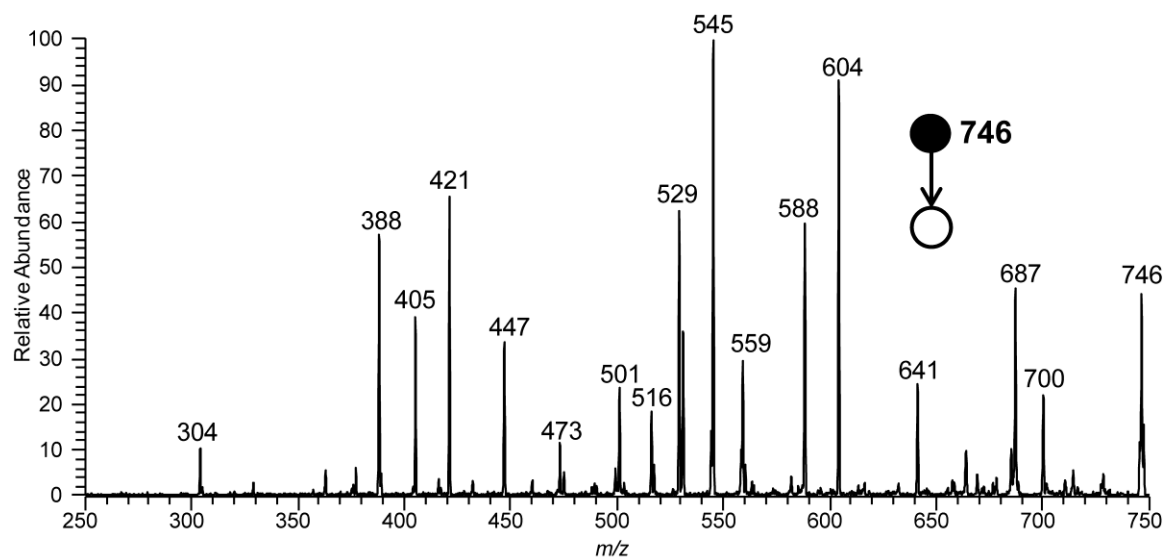

**Figure S3.** CID spectrum of the  $[M+Na+2O_3-C_9H_{18}O_2]^+$  ion formed following ambient ozonolysis of PC (9Z-18:1/9Z-18:1) deposited onto a PTFE coated slide.

### Assignment of additional PC lipids observed by TLC/DESI-MS of human lens extract

The ion at  $m/z$  810 in Figure 5(b) is assigned as the  $[M+Na]^+$  ion of PC (18:0/18:1) which represents *ca.* 8% of total lens PC.<sup>S1</sup> Upon ozonolysis this lipid would be expected to exhibit ions at  $m/z$  700, 732, 728 and 760 corresponding to the aldehyde and hemiacetal ions formed from *n*-9 and *n*-7 double bonds. The  $m/z$  760 is present in the DESI spectrum at very low abundance, while the ions at  $m/z$  700 and 732 are assigned as ozonolysis products of the more abundant PC (16:0/18:1) and  $m/z$  728 can also be assigned as the  $[M+Na]^+$  ion of the known lens lipids PC (14:0/16:0).<sup>S1</sup> However, it is likely that a small fraction of these ion populations are due to ozonolysis of PC (18:0/18:1). the DESI spectrum also reveals an ion at  $m/z$  768 which could correspond to the sodiated ion of the ether lipid, PC (16:0e/18:1).<sup>S1</sup> The low mass ions at  $m/z$  758, 690, 686 and 718 can then be tentatively assigned as the aldehyde and hemiacetal ions following ozonolysis of the isomeric lipids PC (16:0e/9Z-18:1) and PC (16:0e/11Z-18:1), respectively.

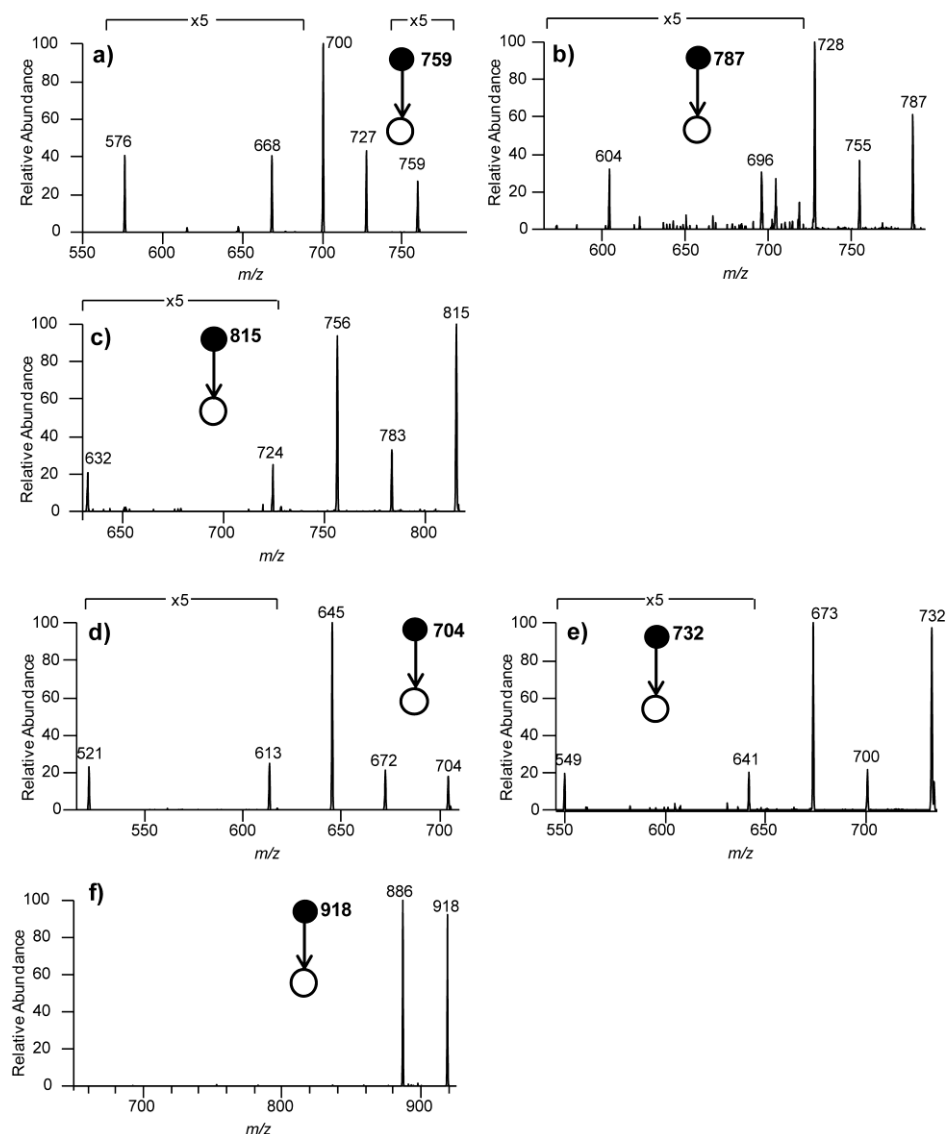

**Figure S4.** CID spectra of the hemiacetals generated following TLC separation and ambient ozonolysis of a human lens lipid extract formed from (a) [SM (d18:0/15Z-24:1)+Na]<sup>+</sup>, (b) [SM (d18:0/17Z-24:1)+Na]<sup>+</sup>, (c) [SM (d18:0/19Z-24:1)+Na]<sup>+</sup>, (d) [PC (16:0/9Z-18:1)+Na]<sup>+</sup>, (e) [PC (16:0/11Z-18:1)+Na]<sup>+</sup> and (f) [LacCer (d18:0/15Z-24:1)+Na]<sup>+</sup>. In all cases a loss of methanol (-32 Da) is observed confirming the assignment of these ions as hemiacetals and thus confirming they are ozonolysis products.

## References

(S1) Deeley, J. M., Mitchell, T. W., Wei, X., Korth, J., Nealon, J. R., Blanksby, S. J., Truscott, R. J. W., *Biochim. Biophys. Acta, Mol. Cell. Biol. Lipids* **2008**, *1781*, 288-298.
